# Supplementary material
Source: HighWire-hosted journal article supplement (https://bmjopen.bmj.com/content/14/5/e081775)
Supplement: inline-supplementary-material-1 [file inline-supplementary-material-1.pdf]

Supplemental Material 1. Convergent, parallel, mixed methods design

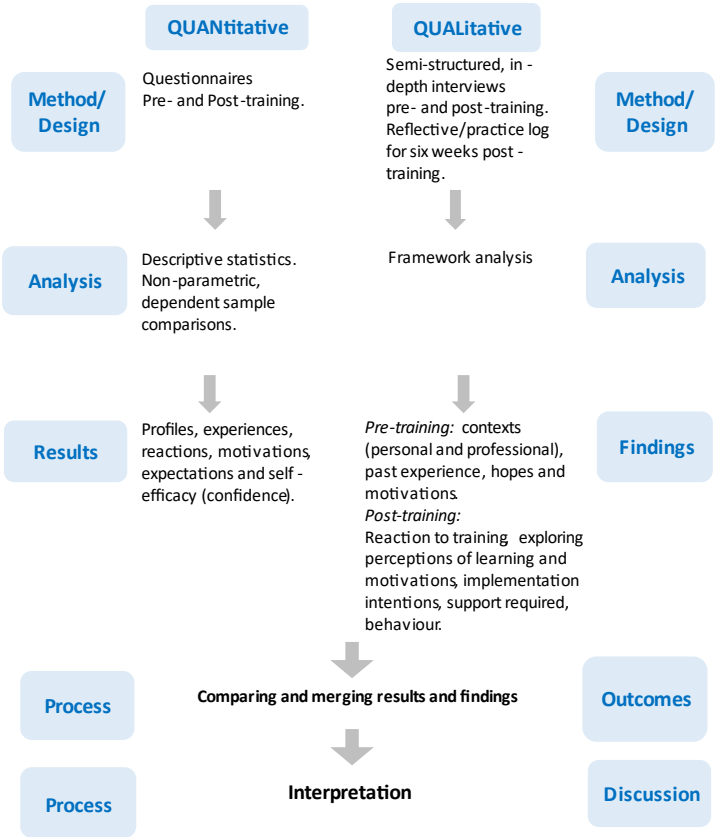

Description of convergent parallel mixed -methods design used adapted from Creswell and Plano Clark 2017
