# Supplementary material
Source: HighWire-hosted journal article supplement (https://bmjopen.bmj.com/content/14/5/e081775)
Supplement: inline-supplementary-material-3 [file inline-supplementary-material-3.pdf]

### Supplemental Material 3.

#### 'No Conversation Too Tough'

#### Outcome Expectancies Questionnaire

Thinking about patients whose cancer cannot be cured, and who have a poor or uncertain prognosis, or whose life expectancy is short.

We'd like to know what you think might be the outcome of having a conversation with a patient about their dependent children.

The following pages contain statements about your expectations.

For each, please circle your response on a score of 1 to 9 where:

1 = Very likely and 9 = Very unlikely.

*Please note: this scale runs in the opposite direction to that in the previous questionnaire.*

| How likely is it that ...                                                                                                                                                      |
|--------------------------------------------------------------------------------------------------------------------------------------------------------------------------------|
| ... you would be helping a patient if you talk to them about their children?<br><i>Very likely - 1 2 3 4 5 6 7 8 9 - Very unlikely</i>                                         |
| ... a patient will become distressed and upset if you ask about their children?<br><i>Very likely - 1 2 3 4 5 6 7 8 9 - Very unlikely</i>                                      |
| ... it will damage the way a patient copes if you ask them about their children?<br><i>Very likely - 1 2 3 4 5 6 7 8 9 - Very unlikely</i>                                     |
| ... you will get too close to a patient if you ask about their feelings or concerns for their children?<br><i>Very likely - 1 2 3 4 5 6 7 8 9 - Very unlikely</i>              |
| ... your workload will become unmanageable if you ask a patient about their children?<br><i>Very likely - 1 2 3 4 5 6 7 8 9 - Very unlikely</i>                                |
| ... you will be criticised by your colleagues if a patient becomes upset when you talk to them about their children?<br><i>Very likely - 1 2 3 4 5 6 7 8 9 - Very unlikely</i> |
| ... you will keep control of the conversation if a patient becomes upset whilst talking about their children?<br><i>Very likely - 1 2 3 4 5 6 7 8 9 - Very unlikely</i>        |

|                                                                                                                                                                   |
|-------------------------------------------------------------------------------------------------------------------------------------------------------------------|
| ... you could say something that will make matters worse for your patient if you try to talk to them about their children?                                        |
| <i>Very likely</i> - 1 2 3 4 5 6 7 8 9 - <i>Very unlikely</i>                                                                                                     |
| ... asking a patient about their concerns will help you identify what may be helpful?                                                                             |
| <i>Very likely</i> - 1 2 3 4 5 6 7 8 9 - <i>Very unlikely</i>                                                                                                     |
| ... a patient will raise concerns/feeling about their children without you asking?                                                                                |
| <i>Very likely</i> - 1 2 3 4 5 6 7 8 9 - <i>Very unlikely</i>                                                                                                     |
| ... if a patient shows strong emotions when talking about their children, it will be overwhelming for you?                                                        |
| <i>Very likely</i> - 1 2 3 4 5 6 7 8 9 - <i>Very unlikely</i>                                                                                                     |
| ... you will feel down if you ask a patient about their children?                                                                                                 |
| <i>Very likely</i> - 1 2 3 4 5 6 7 8 9 - <i>Very unlikely</i>                                                                                                     |
| ... there will not be enough support available to you if you need to reflect on the difficulties you experience when talking with a patient about their children? |
| <i>Very likely</i> - 1 2 3 4 5 6 7 8 9 - <i>Very unlikely</i>                                                                                                     |
| ... you will have colleagues who you can go to if you need emotional support after talking to a patient about their children?                                     |
| <i>Very likely</i> - 1 2 3 4 5 6 7 8 9 - <i>Very unlikely</i>                                                                                                     |

**THANK YOU VERY MUCH FOR COMPLETING THE PRE-TRAINING QUESTIONNAIRES**
