# Supplementary material
Source: HighWire-hosted journal article supplement (https://bmjopen.bmj.com/content/14/5/e081775)
Supplement: inline-supplementary-material-7 [file inline-supplementary-material-7.pdf]

## Supplemental Material 7.

### 'No Conversation Too Tough'

#### After training interview questions

1. First of all, can you tell me what your overall thoughts on the training programme were?
  - Was there anything that worked particularly well for you? Why do you think this worked well for you?
  - Was there anything that worked less well for you? Why do you think this did not work so well for you? How do you think this can be improved in the future?
2. What did you think of the communication about the training beforehand? Was it clear enough to you in advance when and in what format the training would take place?
3. You previously told me that your main reasons for signing up to the training programme were [...]. To what extent do you believe the training programme has met your expectations in relation to this? Why/why not? [*If expectations met: Which elements of the training did you find particularly helpful in relation to this? If not: Why do you think the training programme did not meet these expectations?*]
4. Were there any surprises in the training programme? Can you explain what these were and why it was surprising to you?
5. Was there anything missing in the training programme? [*If so: why is that important? How do you think this could/should be included in the future?*]
6. We are aware that the training day was quite full, with a lot of information and components. Do you think it would be possible to move some elements into pre-course work, for participants to do *before* the course, to free up time on the day for other things? If so, which elements and how do you think this could be done?
7. What did you think of the role play and the actor who carried out the role play? What, if anything, did you get out of this?
8. Thinking about your previous training background, and where you currently are in your career, how did you feel about the suitability of the level of the training programme?
9. Do you believe the training has made a difference to how you feel in terms of your skills and confidence in relation to helping patients whose cancer cannot be cured communicate with and support their dependent children? [*Why and in what way?/Why not?*]
10. And has the training made any difference to how you feel in relation to managing your own emotions and feeling supported?
11. Which elements of the training, if any, do you aim to implement in your practice? How do you intend to do this? What do you think will be the timeline for doing this?
12. Do you think implementing these elements will make a difference to patients? [*If so: how and why? If not: why not?*]
13. What do you believe to be the main barriers and facilitators to implementing your learning from the training in practice/in your workplace? [*In relation to any barriers: do you think these can be overcome? How?*]
14. What support do you need in your workplace to implement learning from the training in your practice? Is this support available? [*If not: what might be most helpful?*]
15. In the training programme, the intention to build a community of practice has been discussed
  - What are your thoughts on this?

- What might you like to get out of a community of practice that will follow on from this? training programme? *Would this include seeking support from the other training participants? How likely do you think you are to stay in touch with the other participants and contact them? Do you think you would benefit from RSF keeping you connected? How?*  
*SHOW SLIDE ABOUT COMMUNITY OF PRACTICE AND ASK WHAT THEY THINK OF THIS*
16. In addition to further improving the training programme, we also aim to improve the way in which we are conducting this evaluation research for the next round of participants. In relation to this, do you have any comments on the questionnaires, these interviews and the reflective log document we are sending out?
  17. Is there anything else that you would like to share before we finish?
